# Supplementary material
Source: PubMed Central journal article supplement (PMC11105780)
Supplement: 18_2018_2810_MOESM1_ESM.pdf [file 18_2018_2810_MOESM1_ESM.pdf]

# Fig. S1

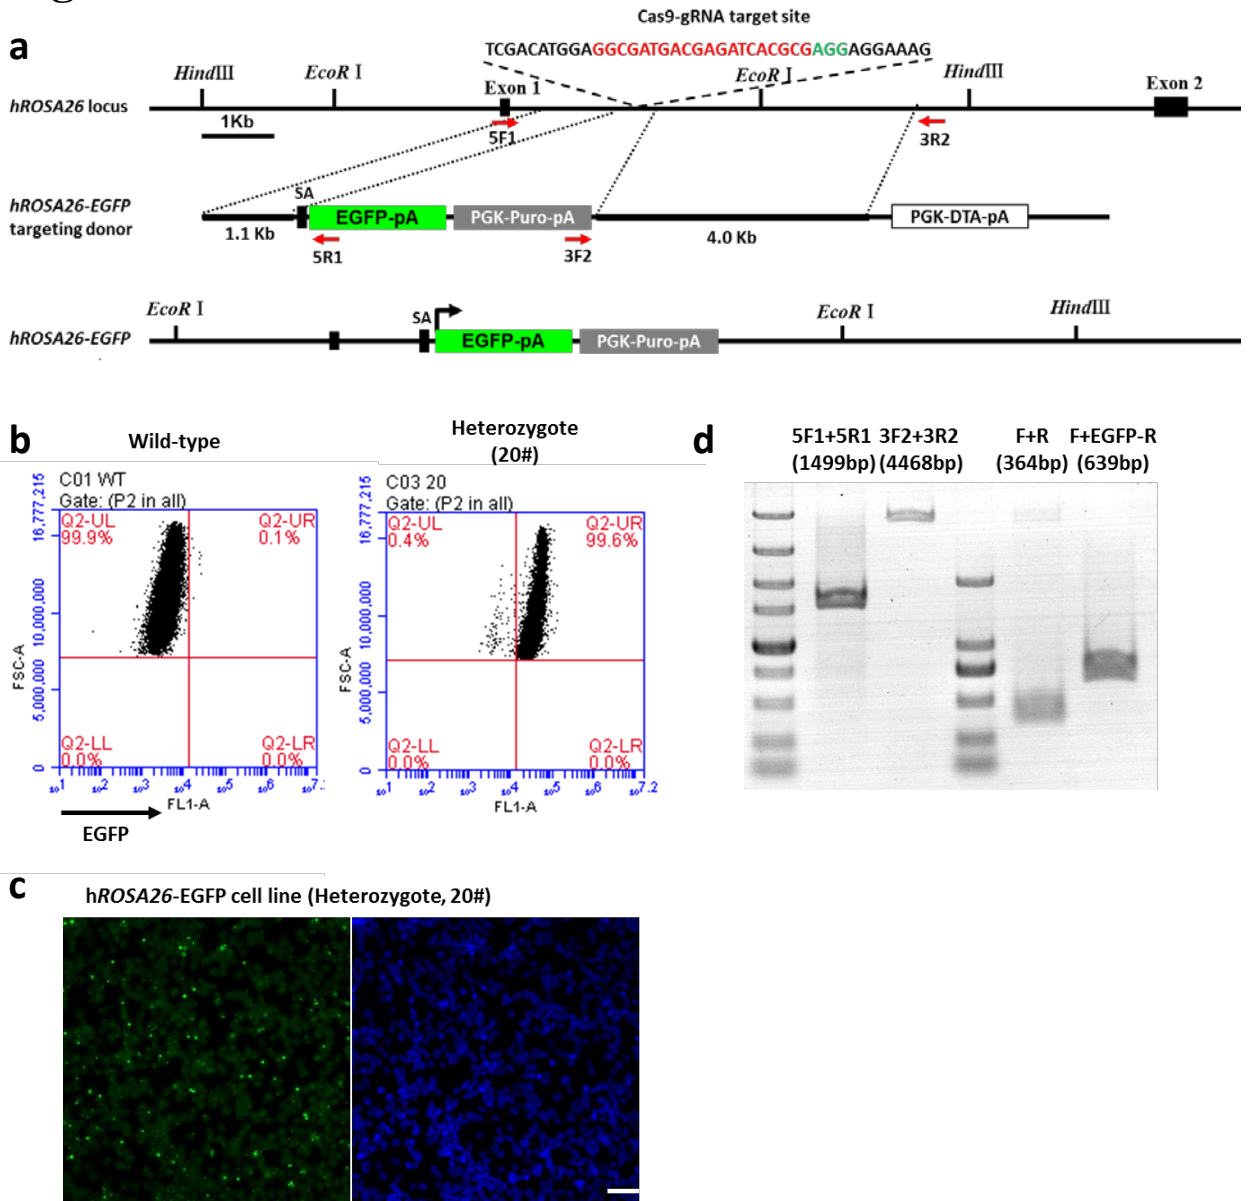

**Fig. S1 Identification of HEK293-EGFP cell line.** (a) A diagram for Cas9-mediated knock-in of *EGFP* into the human *ROSA26* locus via HDR. SA, splice acceptor. (b) FACS analysis of HEK293-EGFP cell line. Left: HEK293 WT cell line, right: HEK293-EGFP cell line. (c) Knock-in pattern analysis of HEK293-EGFP cell line by PCR. 5F1+5R1 were used for detecting 5-ARM, and 3F2+3R2 detecting 3-ARM. (d) Fluorescence microscopy of HEK293-EGFP cell line. Scale bar, 20  $\mu\text{m}$ .

**Fig. S2**

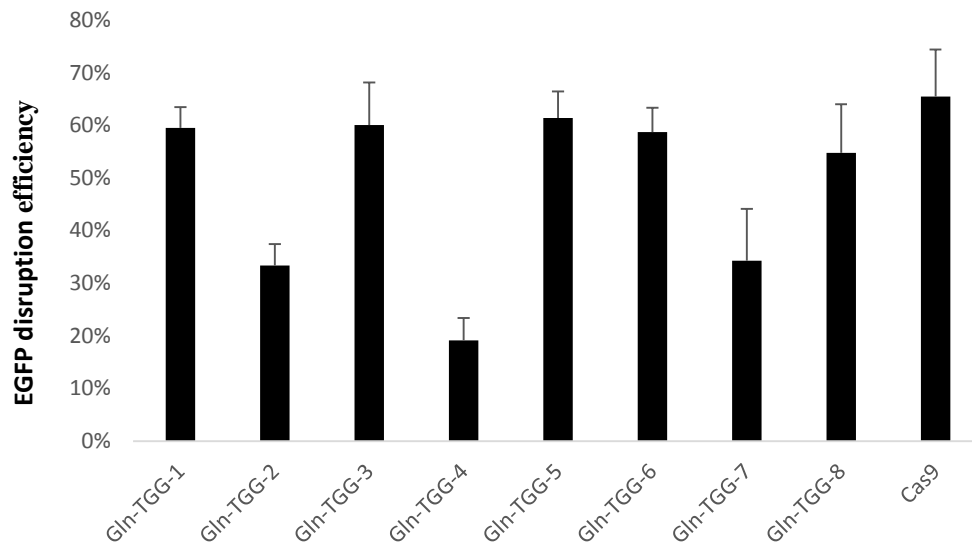

Fig. S2 The EGFP disruption efficiency of Cpf1-gRNA<sup>tRNA</sup> with the same tRNA sequence but different 5' leader sequence were measured by FACS analysis. Error bars indicate s.e.m. (n = 3 independent experiments).

**Fig. S3****Mismatch pattern of EGFP gRNA**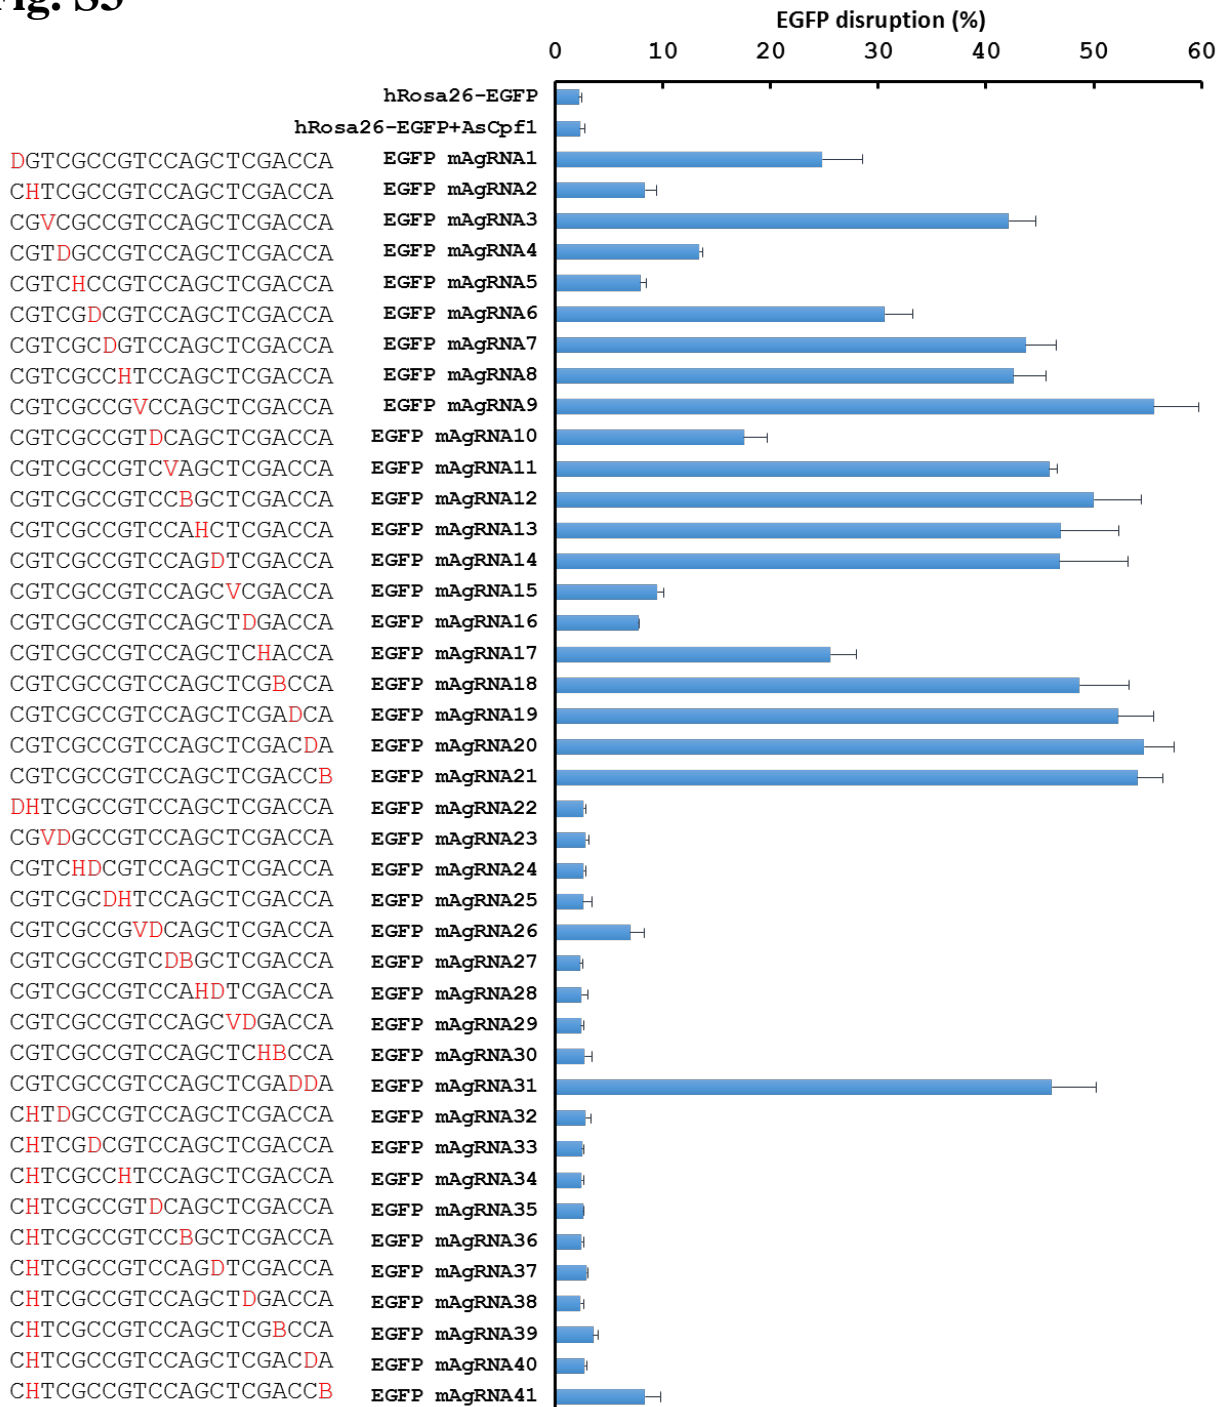

**Fig. S3** The targeting efficiency of Cpf1-gRNA<sup>trNA</sup> for EGFP harboring single or two mismatches in positions 1 through 21 were measured by FACS analysis. Error bars indicate s.e.m. (n = 3 independent experiments).

# Fig. S4

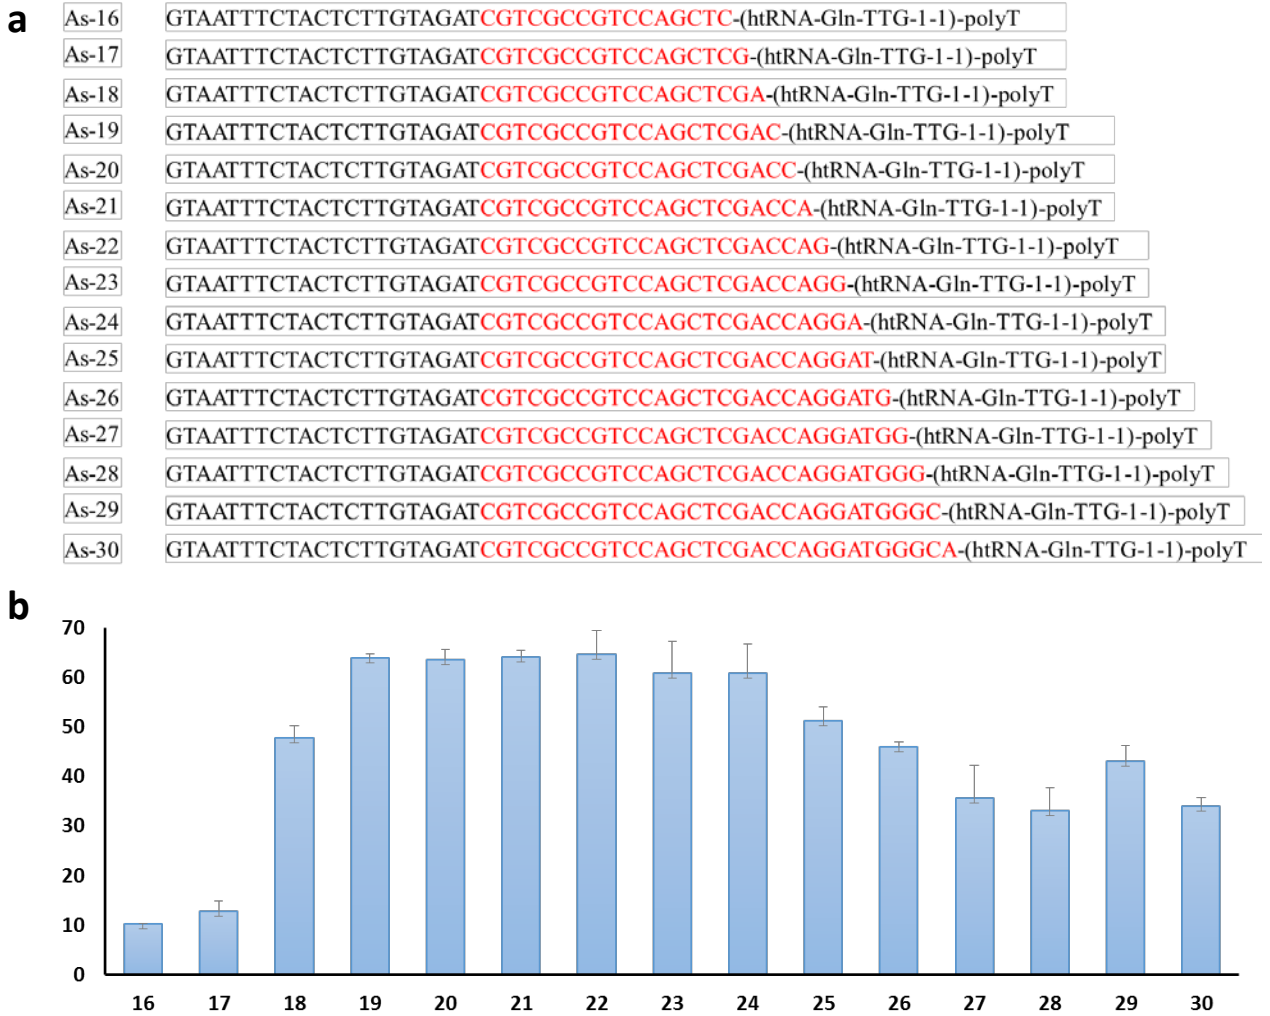

**Fig. S4 Effect of EGFP spacer length on AsCpf1 cleavage activity. (a)** EGFP spacer length from 16 bp to 30 bp. **(b)** EGFP disruption rate analysis by FACS.

# Fig. S5

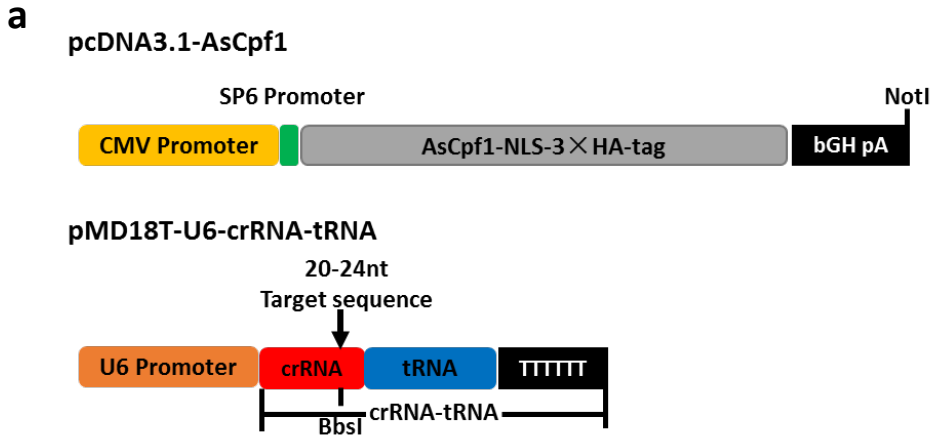

**b**

| Target gene | Target site             | PAM  | Target gene | Target site              | PAM  |
|-------------|-------------------------|------|-------------|--------------------------|------|
| hAAVS1-sg1  | GCAGCCTGTGCTGACCCATCGA  | TTTG | hTET2-sg1   | CCAGACAGAACCTCTGGCTACAAA | TTTG |
| hAAVS1-sg2  | CGCTGCCCTCCTCTCGCCCCGA  | TTTG | hTET2-sg2   | CACAAGAAAGTAGAGGGTATTCCA | TTTA |
| hAAVS1-sg3  | TTAGGATGGCCTTCTCCGACGGA | TTTC | hTET2-sg3   | GTAGCAGTGGAGAGCTACAGGACA | TTTG |
| hAAVS1-sg4  | GGCAGCTCCCCTACCCCTTA    | TTTG | hTET2-sg4   | ACTAGACAAACCACTGCTGCAGAA | TTTG |
| hAAVS1-sg5  | CTGGAGCCATCTCTCCTTGCCA  | TTTC | pROSA26-sg  | TGACACAAACTCAAGACTGTGGGA | TTTG |
| hTET1-sg1   | TTTACATCTTCCTCCTGACTAA  | TTTG | pAPP-sg     | GTGATGAACCTCATAGCCTGAA   | TTTG |
| hTET1-sg2   | GATAGGACTGAGGTTCTTTTCA  | TTTG | pGGTA1-sg   | GATGGCTTTCATCATGCCACTCG  | TTTA |
| hTET1-sg3   | GTGCTATCCACATCAATGGGAA  | TTTG | pNLRP3-sg   | CATTCACTGTGGGAGGTGAGCC   | TTTA |
| hTET1-sg4   | GGTATGGGTTGCATCCTGACATG | TTTG |             |                          |      |

**Fig. S5 Cpf1-gRNA<sup>tRNA</sup> system mediated efficiently genome editing in human cells and mammal embryos. (a)** Schematic depiction of the AsCpf1 and gRNA<sup>tRNA</sup> transcription plasmid. **(b)** Target sequences of gRNAs used to target human and porcine endogenous gene in this study.

# Fig. S6

a

## Rabbit *WRN* locus(chromosome 2)

5' -GTGGGATTTGACATGGAATGGCCACCAGTGTACACTAAAGGGAAATCAAGTAGAGTTGCA-3'  
 3' -CACCTAAACTGTACCTT**ACCGGTGGT**CACATGTGATTTCC**CTT**AGTTCATCTCAACGT-5'

E4-gRNA

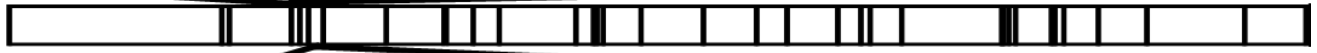

Exon 6

b

5' -AGAGACCTGGAGCCTCAATGGTCTGGTTAAGCACCTCCTAGGTAAACAGCTTCTGAAAGA-3'  
 3' -TCTCTGGACCTCGGAGTT**ACCAGACCAATTCG**TGGAGGATCC**ATT**TGTCGAAGACTTTCT-5'

E6-gRNA

|      |                                                                                          |            |
|------|------------------------------------------------------------------------------------------|------------|
|      | 5' -AGAGACCTGGAGCCTCAA <b>TGGTCTGGTTAAGCACCTCCTAGGTAAAC</b> CAGCTTCTGAAAGA-3'            | WT         |
| E-1# | 5' -AGAGACCTGGAGCCTCAA----- <b>GTA</b> AAACAGCTTCTGAAAGA-3'                              | (Δ 23)     |
|      | 5' -AGAGACCTGGAGCCTCA----- <b>CCTCCTAGGTAAAC</b> CAGCTTCTGAAAGA-3'                       | (Δ 16)     |
|      | 5' -AGAGACCTGGAGCCTCAAT----- <b>TAAGCACCTCCTAGGTAAAC</b> CAGCTTCTGAAAGA-3'               | (Δ 8)      |
|      | 5' -AGAGACCTGGAGCCTCAAT----- <b>AGGTAAAC</b> CAGCTTCTGAAAGA-3'                           | (Δ 20)     |
|      | 5' -AGAGACCTGGAGC----- <b>ACCTCCTAGGTAAAC</b> CAGCTTCTGAAAGA-3'                          | (Δ 19)     |
| E-2# | 5' -AGAGACCTGGAGCCTCAA <b>TGG</b> ----- <b>GTTAAGCACCTCCTAGGTAAAC</b> CAGCTTCTGAAAGA-3'  | (Δ 4)      |
|      | 5' -AGAGACCTGGAGCCTC----- <b>CTAGGTAAAC</b> CAGCTTCTGAAAGA-3'                            | (Δ 21)     |
| E-3# | 5' -AGAGACCTGGAGCCTCAA----- <b>GCACCTCCTAGGTAAAC</b> CAGCTTCTGAAAGA-3'                   | (Δ 12)     |
|      | 5' -AGAGACCTGGAGCCTC----- <b>TAGGTAAAC</b> CAGCTTCTGAAAGA-3'                             | (Δ 22)     |
|      | 5' -AGAGACCTGGAGCCTC----- <b>CTAGGTAAAC</b> CAGCTTCTGAAAGA-3'                            | (Δ 21)     |
|      | 5' -AGAGACCTGGAGC----- <b>ACCTCCTAGGTAAAC</b> CAGCTTCTGAAAGA-3'                          | (Δ 19)     |
| E-4# | 5' -AGAGACCTGGAGC----- <b>ACCTCCTAGGTAAAC</b> CAGCTTCTGAAAGA-3'                          | (Δ 19)     |
|      | 5' -AGAGACCTGGAGCCTC----- <b>CTAGGTAAAC</b> CAGCTTCTGAAAGA-3'                            | (Δ 21)     |
|      | 5' -AGAGACCTGGAGCCTCAA <b>aa</b> ----- <b>AAGCACCTCCTAGGTAAAC</b> CAGCTTCTGAAAGA-3'      | (Δ 10, +2) |
|      | 5' -AGAGACCTGGAGCCTCAA <b>TGGT-T</b> ----- <b>AGCACCTCCTAGGTAAAC</b> CAGCTTCTGAAAGA-3'   | (Δ 6)      |
|      | 5' -AGAGACCTGGAGCCTCAAT----- <b>TGGTTAAGCACCTCCTAGGTAAAC</b> CAGCTTCTGAAAGA-3'           | (Δ 4)      |
| E-5# | 5' -AGAGACCTGGAGCCTCAA <b>TGGTC</b> ----- <b>AAGCACCTCCTAGGTAAAC</b> CAGCTTCTGAAAGA-3'   | (Δ 5)      |
|      | 5' -AGAGACCTGGAGCCTCAA----- <b>GCTTCTGAAAGA</b> -3'                                      | (Δ 30)     |
|      | 5' -AGAGACCTGGAGCCTCAAT----- <b>TAAGCACCTCCTAGGTAAAC</b> CAGCTTCTGAAAGA-3'               | (Δ 8)      |
| E-6# | 5' -AGAGACCTGGAGCCTCA <b>ga</b> ----- <b>GCACCTCCTAGGTAAAC</b> CAGCTTCTGAAAGA-3'         | (Δ 15, +2) |
|      | 5' -AGAGACCTGGAGCCTCAAT <b>TGGTC</b> ----- <b>AAGCACCTCCTAGGTAAAC</b> CAGCTTCTGAAAGA-3'  | (Δ 5)      |
|      | 5' -AGAGACCTGGAGCCTCAA----- <b>AGCACCTCCTAGGTAAAC</b> CAGCTTCTGAAAGA-3'                  | (Δ 11)     |
|      | 5' -AGAGACCTGGAGC----- <b>ACCTCCTAGGTAAAC</b> CAGCTTCTGAAAGA-3'                          | (Δ 19)     |
|      | 5' -AGAGACCTGGAGCCTC----- <b>CTAGGTAAAC</b> CAGCTTCTGAAAGA-3'                            | (Δ 21)     |
|      | 5' -AGAGACCTGGAGCCTCAA----- <b>AAGCACCTCCTAGGTAAAC</b> CAGCTTCTGAAAGA-3'                 | (Δ 10)     |
| E-7# | 5' -AGAGACCTGGAGCCTC <b>ca</b> ----- <b>GGTAAAC</b> CAGCTTCTGAAAGA-3'                    | (Δ 24, +2) |
|      | 5' -AGAGACCTGGAGC----- <b>ACCTCCTAGGTAAAC</b> CAGCTTCTGAAAGA-3'                          | (Δ 19)     |
|      | 5' -AGAGACCTGGAGCCTCAAT <b>TGG</b> ----- <b>GTTAAGCACCTCCTAGGTAAAC</b> CAGCTTCTGAAAGA-3' | (Δ 4)      |
|      | 5' -AGAGACCTGGAGCCTCAAT <b>TG</b> ----- <b>TAAAC</b> CAGCTTCTGAAAGA-3'                   | (Δ 22)     |
|      | 5' -AGAGACCTGGAGCCTC----- <b>CTAGGTAAAC</b> CAGCTTCTGAAAGA-3'                            | (Δ 21)     |
| E-8# | 5' -AGAGACCTGGAGC----- <b>ACCTCCTAGGTAAAC</b> CAGCTTCTGAAAGA-3'                          | (Δ 19)     |
|      | 5' -AGAGACCTGGAGCCTCAAT <b>TG</b> ----- <b>GTTAAGCACCTCCTAGGTAAAC</b> CAGCTTCTGAAAGA-3'  | (Δ 5)      |
|      | 5' -AGAGACCTGGAGCCTC <b>ca</b> ----- <b>GGTAAAC</b> CAGCTTCTGAAAGA-3'                    | (Δ 24, +2) |
|      | 5' -AGAGACCTGGAGCCTCAAT <b>TGG</b> ----- <b>GTTAAGCACCTCCTAGGTAAAC</b> CAGCTTCTGAAAGA-3' | (Δ 4)      |
|      | 5' -AGAGACCTGGAGCCTC----- <b>CTAGGTAAAC</b> CAGCTTCTGAAAGA-3'                            | (Δ 21)     |
|      | 5' -AGAGACCTGGAGCCTCAAT <b>TGGT-T</b> ----- <b>AGCACCTCCTAGGTAAAC</b> CAGCTTCTGAAAGA-3'  | (Δ 6)      |

Rabbit *WRN* E6 Locus

**Fig. S6 Genome editing of *WRN* gene in rabbits embryos via the Cpf1- gRNA<sup>trNA</sup> system. (a) Two target sites in the rabbit *WRN* locus at exons 4 and 6, respectively. The target sequence and PAM are indicated by red and green. (b) Genotype of rabbit blastocysts injection AsCpf1 mRNA and *WRN* Exon 4 gRNA<sup>trNA</sup>.**



# Fig. S7

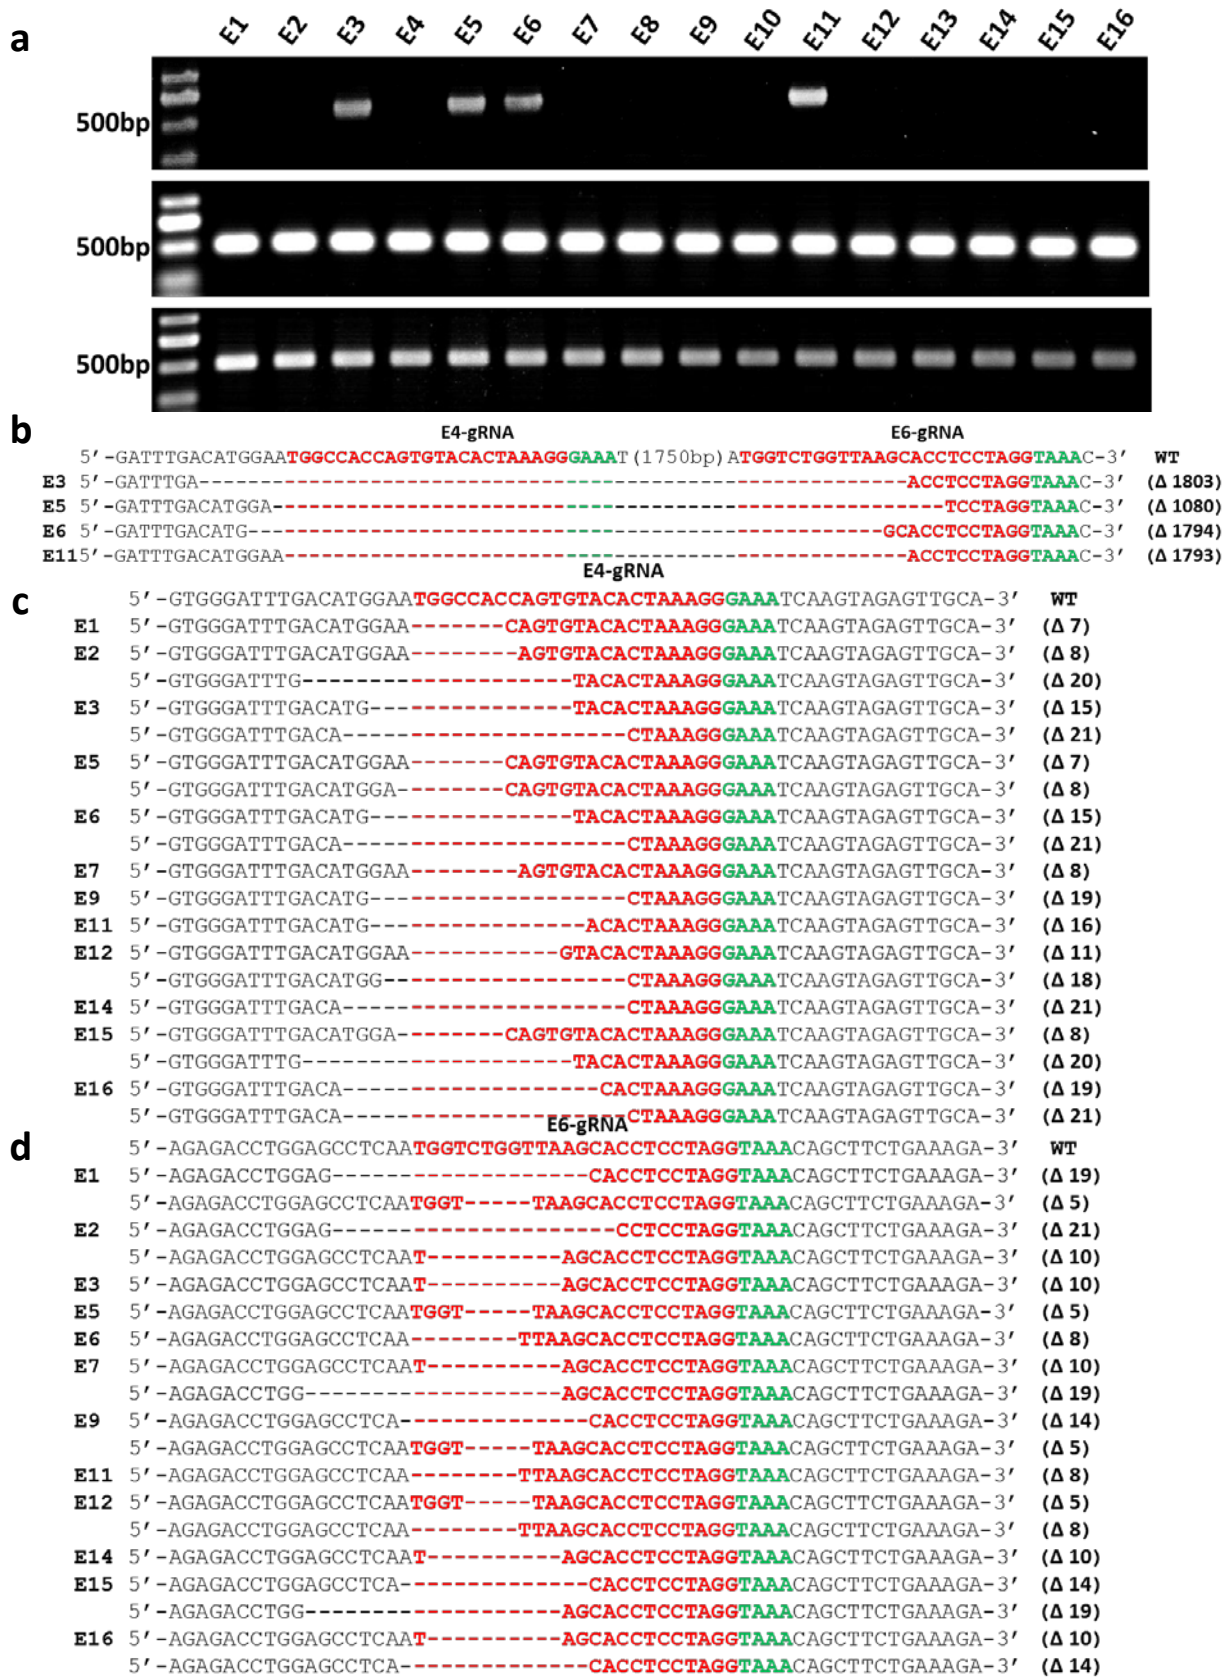

**Fig. S7 Mutation patterns analysis of rabbit blastocysts when co-injection E4-gRNA<sup>trNA</sup> and E6-gRNA<sup>trNA</sup> with AsCpf1 mRNA. (a) Agarose gel electrophoresis assay were performed to identify WRN large fragment deletion in collected blastocysts. Embryos 3#, 5#, 6#, and 11# harbored large fragment deletion. (b) T-cloning and Sanger sequencing of deletion of WRN in 3#, 5#, 6#, and 11# embryos. PAM sites are highlighted in green; target sequences are red. (c) and (d) T-cloning and Sanger sequencing of the target site for each gRNA in injected embryos. PAM sites are labeled in green; target sequences are red.**

# Fig. S8

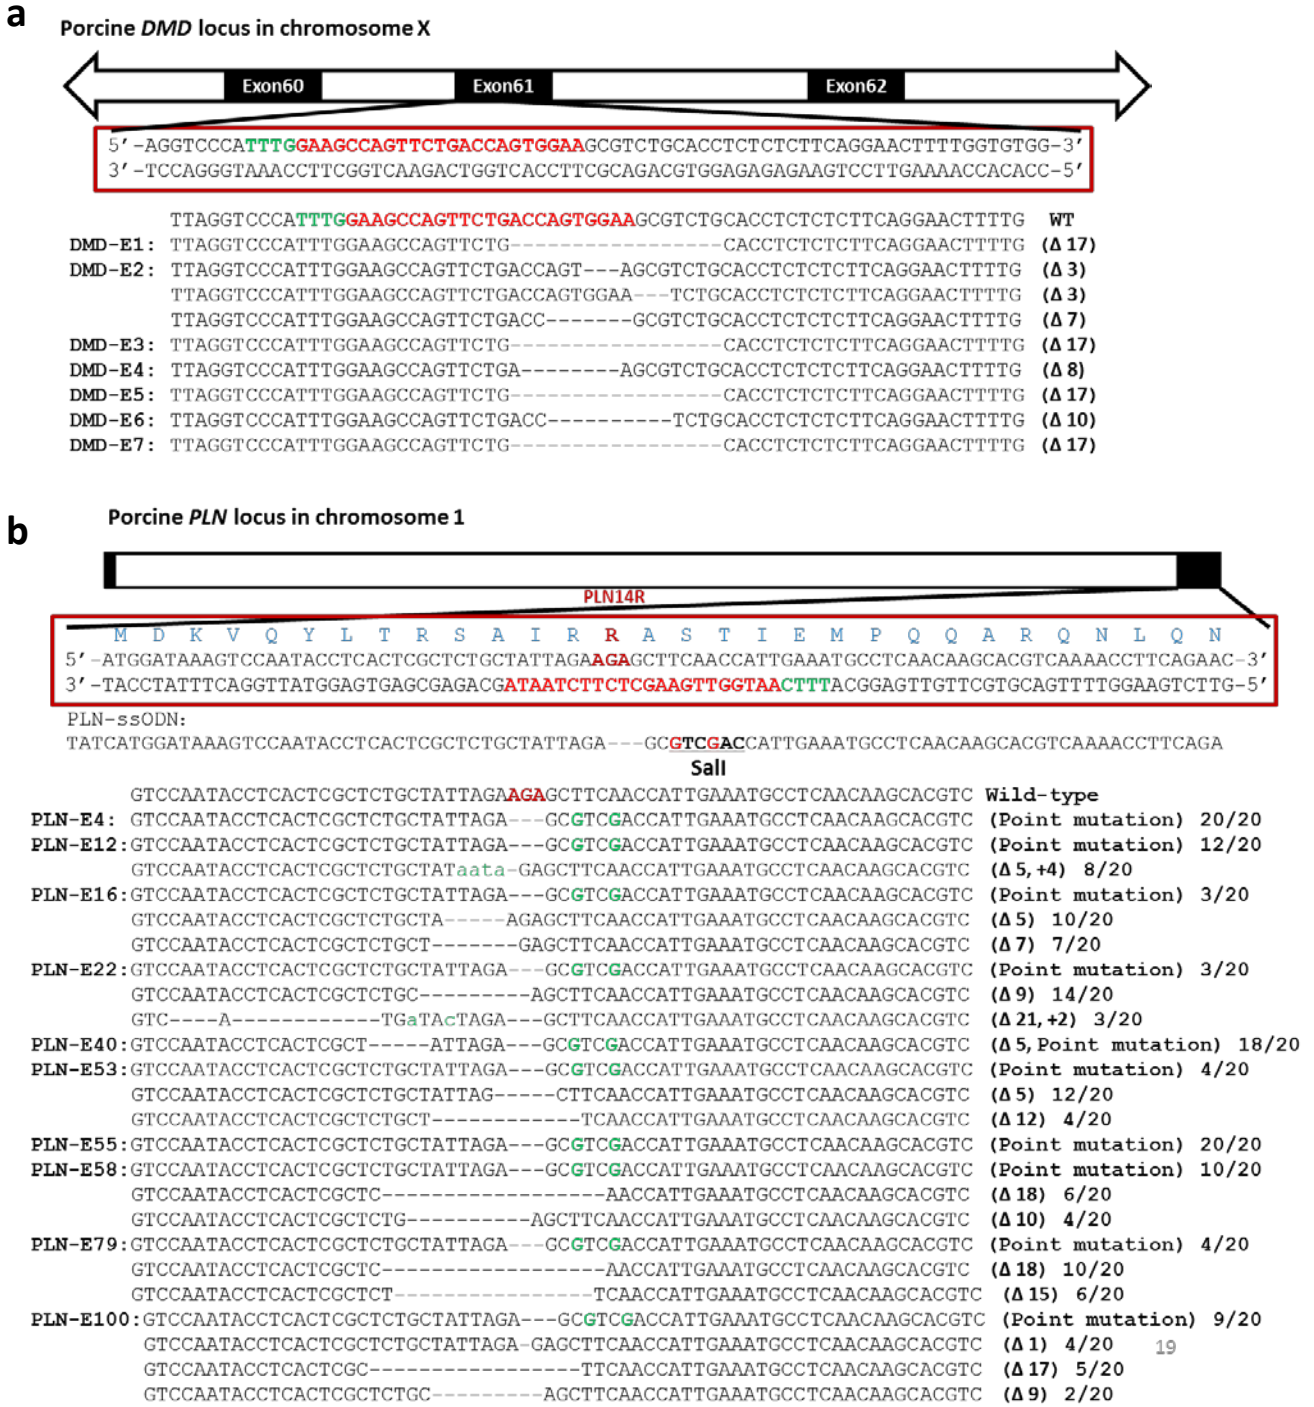

**Fig. S8** Genotype of PA porcine embryos injected with Cpf1-gRNA<sup>trNA</sup> system targeting porcine *DMD* and *PLN* loci.



# Fig. S9

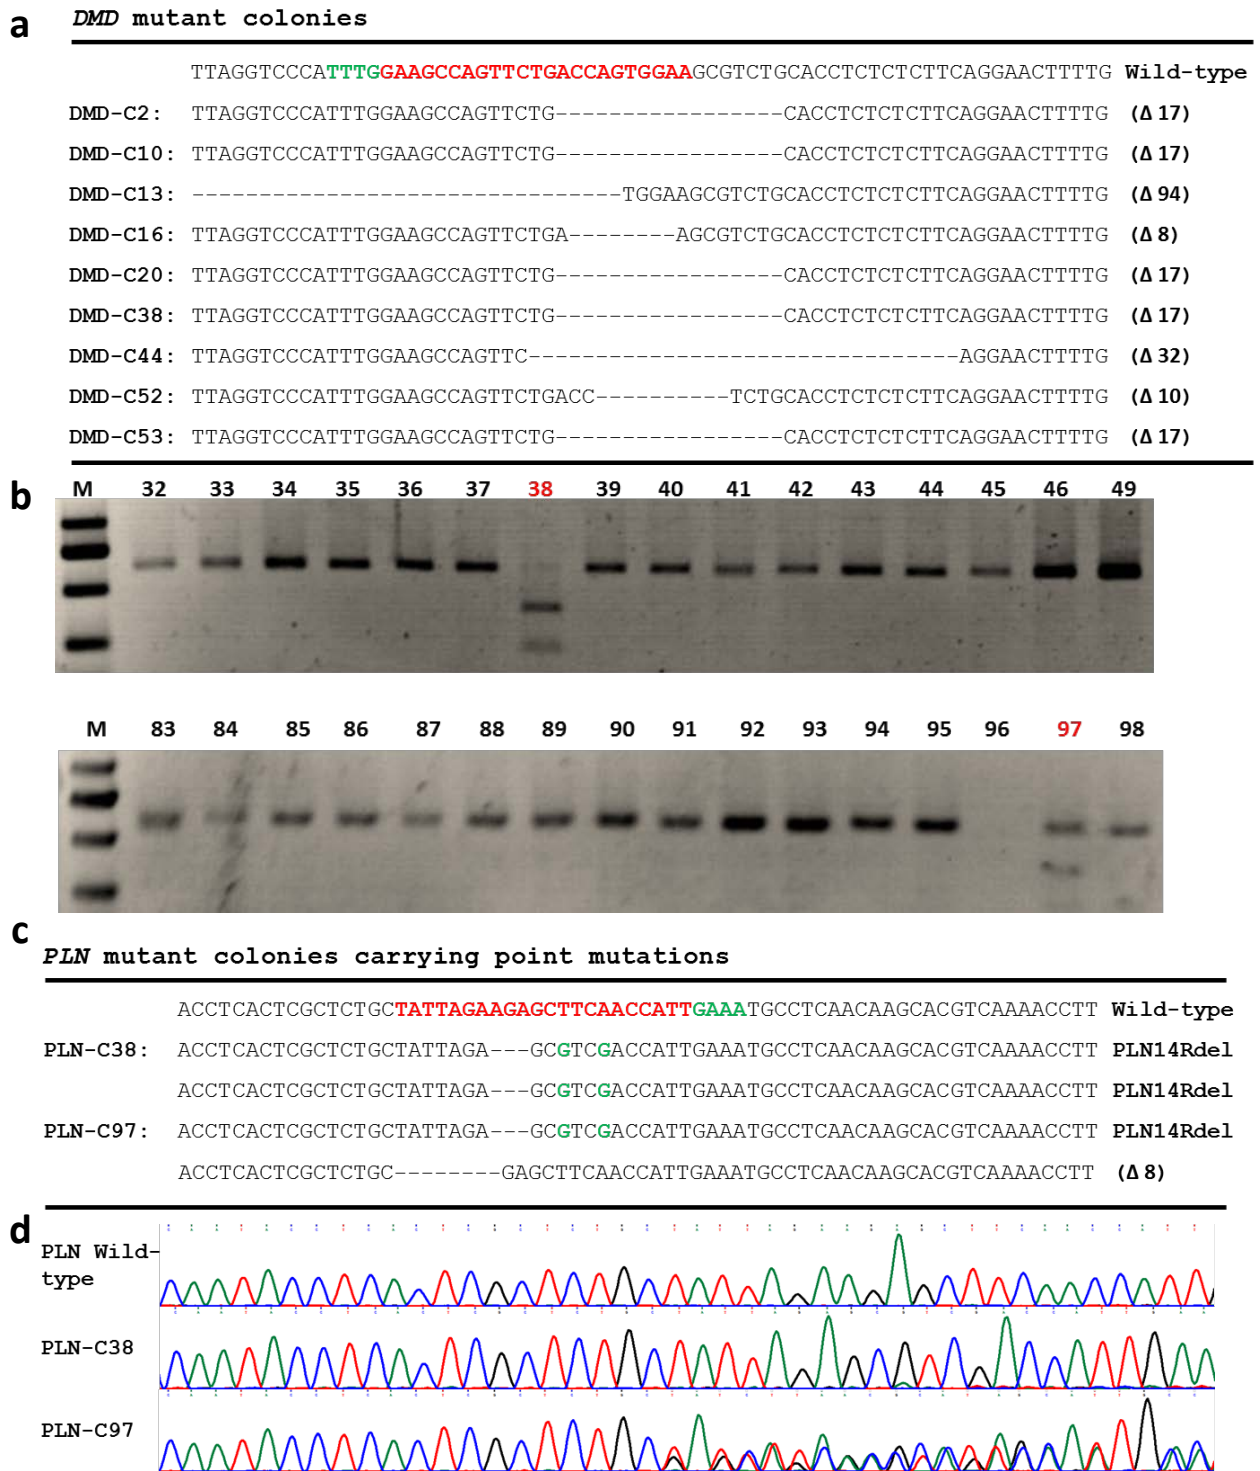

**Fig. S9 Genotype analysis of selected PFF individual colonies.** (a) Genotype of *DMD* mutant colonies. The WT sequence is shown at the top. The target sequence and PAM are indicated by red and green, respectively. (b) Identification of selected colonies by PCR-Sal I digestion. No.39 and 97 colony can be digested by Sal I restriction enzyme. (c) Genotype of *PLN*<sup>R14del</sup> mutant colonies carrying point mutations. (d) Sanger sequencing of the target sites in the two *PLN*<sup>R14del</sup> mutant colonies.

# Fig. S10

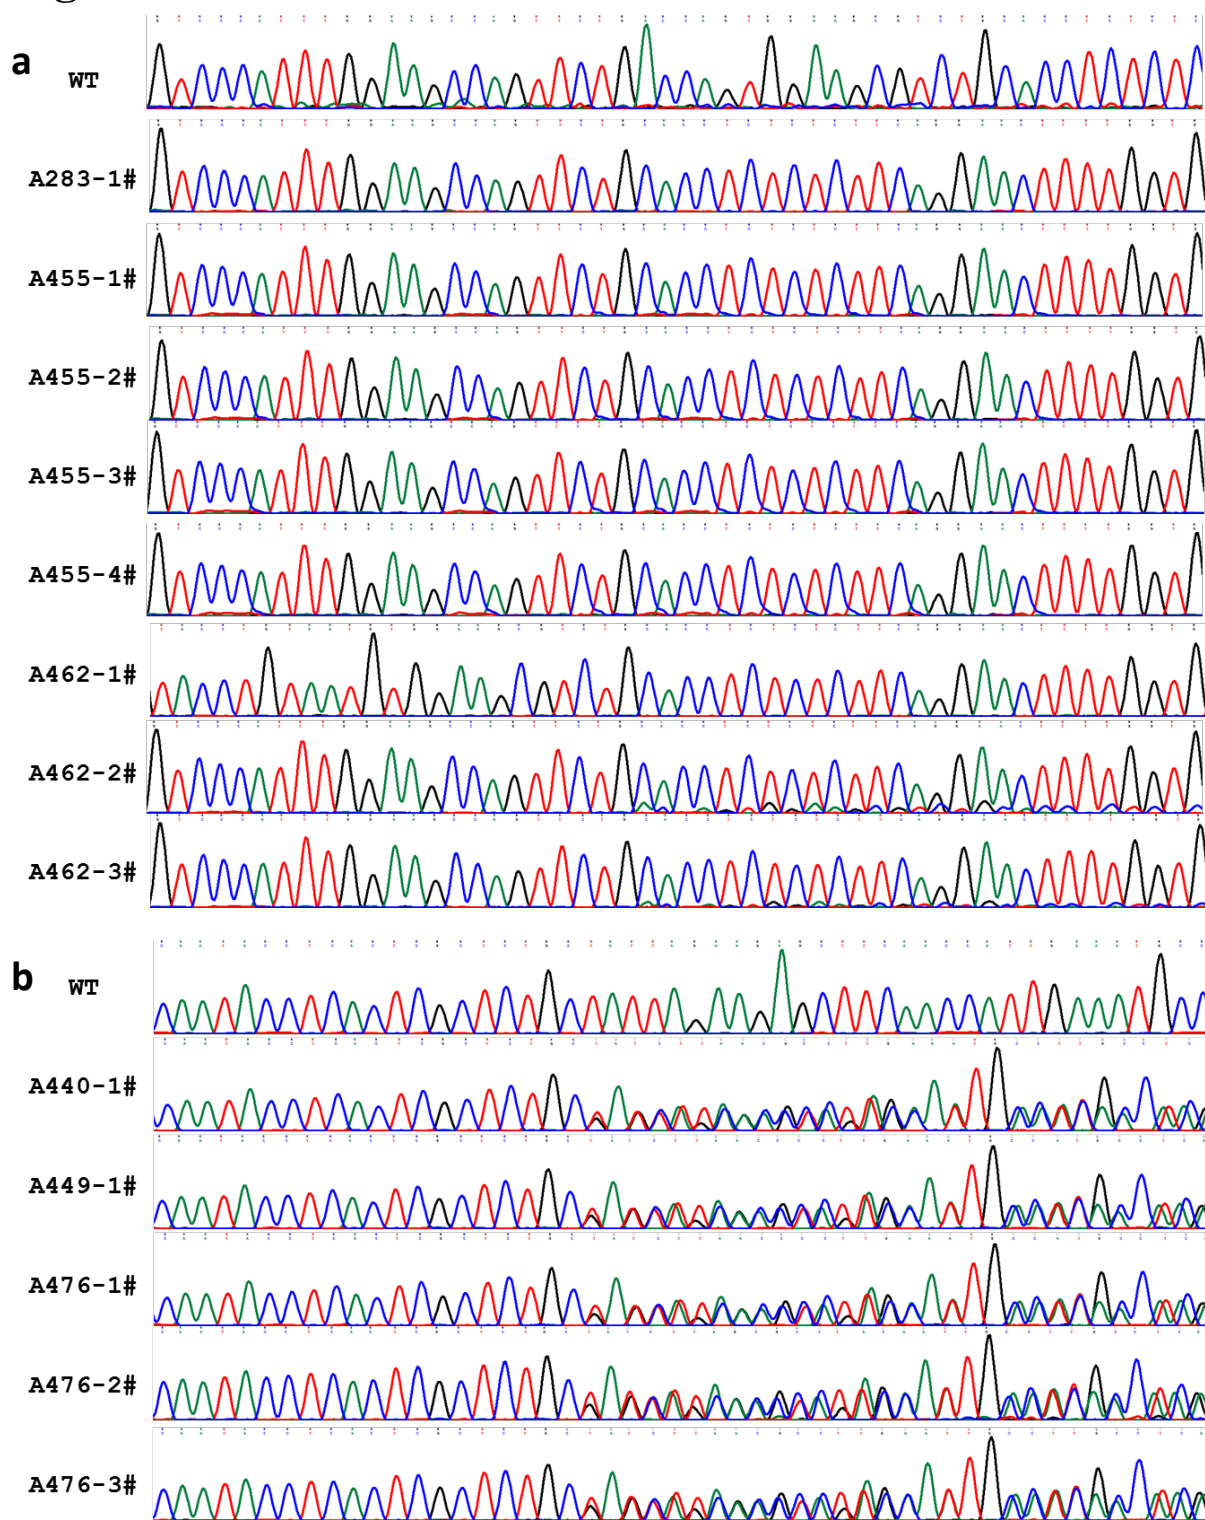

**Fig. S10** Sanger sequencing of the target sites in all DMD KO (a) and *PLN<sup>R14del</sup>* (b) cloned pigs.
